# Supplementary material for: Pregnancy outcomes in Korean women with ankylosing spondylitis
Source: PubMed Central journal article supplement — Korean J Intern Med. 2019 Sep 26;36(3):721–30. doi: 10.3904/kjim.2019.144 (PMC8137399; doi:10.3904/kjim.2019.144), 2019-09-26
Supplement: kjim-2019-144-suppl1.pdf [file kjim-2019-144-suppl1.pdf]

**Supplementary Table 1. ICD-10 codes and HIRA procedure code for delivery used in the population-based cohort study**

|                                              | Code                                                                                                    |
|----------------------------------------------|---------------------------------------------------------------------------------------------------------|
| <b>Comorbidity (ICD-10)</b>                  |                                                                                                         |
| Hypertension                                 | I10                                                                                                     |
| Diabetes mellitus                            | E10, E11, E12, E13, E14                                                                                 |
| Uveitis                                      | H20, H200, H201, H202, H208, H209, H221                                                                 |
| Inflammatory bowel disease                   | K50, K500, K501, K508, K509, K51, K511, K512, K513, K514, K515, K518, K519, K528, K529, M074, M075      |
| Psoriasis                                    | L40, L400, L401, L402, L403, L404, L405, L408, L409, M07, M070, M072, M073, M090                        |
| <b>Pregnancy complication (ICD-10)</b>       |                                                                                                         |
| Preeclampsia                                 | O140, O141, O149                                                                                        |
| Preterm delivery                             | O601, O603                                                                                              |
| Placental abruption                          | O45                                                                                                     |
| Other obstetric trauma                       | O71                                                                                                     |
| Maternal distress during labour and delivery | O750                                                                                                    |
| <b>Delivery (HIRA procedure code)</b>        |                                                                                                         |
| Vaginal delivery                             | R3131, R3133, R3136, R3138, R3141, R3143, R3146, R3148, R4351, R4353, R4356, R4358, R4361, R4362, R4380 |
| Caesarean section                            | R4507, R4508, R4509, R4510, R4514, R4516, R4517, R4518, R4519, R4520, R5001, R5002                      |
| Twin pregnancy                               | R3133, R3138, R3143, R3148, R4353, R4358, R4516, R4519, R4520, R5001, R5002                             |
| Multiparous delivery                         | R3136, R3138, R3146, R3148, R4356, R4358, R4362, R4380, R4508, R4510, R4514, R4516, R4518, R4520, R5002 |

ICD-10, International Classification of Disease and Related Health Problems, 10th revision; HIRA, Health Insurance Review and Assessment Service.
