# Supplementary material for: Pregnancy outcomes in Korean women with ankylosing spondylitis
Source: PubMed Central journal article supplement — Korean J Intern Med. 2019 Sep 26;36(3):721–30. doi: 10.3904/kjim.2019.144 (PMC8137399; doi:10.3904/kjim.2019.144), 2019-09-26
Supplement: kjim-2019-144-suppl2.pdf [file kjim-2019-144-suppl2.pdf]

**Supplementary Table 2. Baseline characteristics of women with AS and controls: hospital-based cohort**

| Characteristic                                 | Pregnancies with AS (n = 27) | Pregnancies without AS (n = 108) | p value <sup>a</sup> |
|------------------------------------------------|------------------------------|----------------------------------|----------------------|
| Maternal age, yr                               | 32.3 ± 3.2                   | 32.2 ± 3.1                       | 0.856                |
| Prepregnancy BMI, kg/m <sup>2</sup>            |                              |                                  | 0.648 <sup>b</sup>   |
| Underweight, < 18.5                            | 7 (25.9)                     | 18 (16.7)                        |                      |
| Normal weight, 18.5–24.9                       | 18 (66.7)                    | 79 (73.1)                        |                      |
| Overweight, 25–29.9                            | 2 (7.4)                      | 9 (8.3)                          |                      |
| Obese, ≥ 30                                    | 0                            | 2 (1.9)                          |                      |
| Parity                                         |                              |                                  | 0.853                |
| 0                                              | 16 (59.3)                    | 67 (62.0)                        |                      |
| 1                                              | 9 (33.3)                     | 31 (28.7)                        |                      |
| 2 or more                                      | 2 (7.4)                      | 10 (9.3)                         |                      |
| Previous preterm delivery                      | 2 (7.4)                      | 4 (3.7)                          | 0.487                |
| Previous delivery method                       |                              |                                  | 0.538                |
| No previous delivery                           | 15 (55.6)                    | 64 (59.3)                        |                      |
| Vaginal delivery                               | 8 (29.6)                     | 37 (34.3)                        |                      |
| Cesarean section                               | 4 (14.8)                     | 7 (6.5)                          |                      |
| Comorbidities                                  |                              |                                  |                      |
| Hypertension/PIH                               | 1 (3.7)                      | 7 (6.5)                          | 0.588                |
| GDM                                            | 1 (3.7)                      | 8 (7.4)                          | 0.498                |
| HBV carrier                                    | 2 (7.4)                      | 3 (2.8)                          | 0.360                |
| Valvular heart disease                         | 0                            | 3 (2.8)                          | > 0.999 <sup>b</sup> |
| Hyperthyroidism                                | 0                            | 2 (1.9)                          | > 0.999 <sup>b</sup> |
| Hypothyroidism                                 | 1 (3.7)                      | 5 (4.6)                          | 0.827                |
| Education level                                |                              |                                  | 0.788                |
| University                                     | 24 (88.9)                    | 94 (87.0)                        |                      |
| High school                                    | 3 (11.1)                     | 14 (13.0)                        |                      |
| Smoking                                        | 0                            | 0                                | -                    |
| Laboratory tests                               |                              |                                  |                      |
| WBC, mm <sup>3</sup>                           | 8,639.6 ± 2,168.6            | 9,844.3 ± 2,790.0                | 0.010                |
| Hemoglobin, g/dL                               | 11.8 ± 1.4                   | 11.9 ± 1.3                       | 0.617                |
| Platelet, mm <sup>3</sup>                      | 233.8 ± 48.2                 | 212.4 ± 46.4                     | 0.142                |
| hs-CRP, mg/L                                   | 0.7 ± 0.8                    | 0.8 ± 1.6                        | 0.351                |
| ESR, mm/hr                                     | 44.1 ± 27.6                  | 29.0 ± 0.0                       | 0.482                |
| HLA-B27 positivity <sup>c</sup>                | 18 (85.7)                    | ND                               |                      |
| AS duration, yr <sup>c</sup>                   | 4.4 ± 2.7                    | ND                               |                      |
| Medication use prior to pregnancy <sup>c</sup> |                              |                                  |                      |
| NSAIDs                                         | 21 (100.0)                   | ND                               | -                    |
| Corticosteroid                                 | 6 (28.6)                     | ND                               |                      |
| Sulfasalazine                                  | 10 (47.6)                    | ND                               |                      |
| Biologics                                      | 6 (28.6)                     | ND                               |                      |
| Azathioprine                                   | 1 (4.8)                      | ND                               |                      |
| Opioid                                         | 0                            | ND                               |                      |

Values are presented as mean ± SD or number (%).

AS, ankylosing spondylitis; BMI, body mass index; PIH, pregnancy induced hypertension; GDM, gestational diabetes mellitus; HBV, hepatitis B virus; WBC, white blood cell; hs-CRP, high-sensitivity C-reactive protein; ND, not done; ESR, erythrocyte sedimentation rate; NSAID, nonsteroidal anti-inflammatory drug.

<sup>a</sup>p value: calculated from regression models estimated using generalised estimating equations (GEEs) to account for the matched nature of the data.

<sup>b</sup>p value: calculated from Fisher's exact test or chi-square test because of zero events in either group in which GEE models do not converge.

<sup>c</sup>Pregnancies with AS with medical records of the rheumatologic clinic (n = 21).
