# Supplementary material for: Pregnancy outcomes in Korean women with ankylosing spondylitis
Source: PubMed Central journal article supplement — Korean J Intern Med. 2019 Sep 26;36(3):721–30. doi: 10.3904/kjim.2019.144 (PMC8137399; doi:10.3904/kjim.2019.144), 2019-09-26
Supplement: kjim-2019-144-suppl3.pdf [file kjim-2019-144-suppl3.pdf]

**Supplementary Table 3. Caesarean section rate according to grading of sacroiliitis in patients with AS: hospital-based cohort**

| Grading of sacroiliitis | Number | Caesarean section, n (%) | <i>p</i> value <sup>a</sup> |
|-------------------------|--------|--------------------------|-----------------------------|
| Bilateral grade 2       | 12     | 4 (33.3)                 | 0.053                       |
| Unilateral grade 3      | 4      | 4 (100.0)                |                             |
| Bilateral grade 3       | 6      | 2 (33.3)                 |                             |
| Total ankyloses         | 0      | -                        |                             |

AS, ankylosing spondylitis.

<sup>a</sup>*p* value: calculated from chi-square test, *p* value = 0.342 tested for trend.
