# Supplementary material for: Pregnancy outcomes in Korean women with ankylosing spondylitis
Source: PubMed Central journal article supplement — Korean J Intern Med. 2019 Sep 26;36(3):721–30. doi: 10.3904/kjim.2019.144 (PMC8137399; doi:10.3904/kjim.2019.144), 2019-09-26
Supplement: kjim-2019-144-suppl4.pdf [file kjim-2019-144-suppl4.pdf]

**Supplementary Table 4. Pregnancy outcomes in women with AS and control: Korean HIRA claims database (primipara)**

| Outcome                                      | With AS (n = 749) | Without AS (n = 6,403) | OR   | 95% CI    | Adjusted OR       | 95% CI    |
|----------------------------------------------|-------------------|------------------------|------|-----------|-------------------|-----------|
| No complication (ref)                        | 327 (43.7)        | 3,601 (56.2)           | 1.00 |           | 1.00              |           |
| Overall complication                         | 422 (56.3)        | 2,802 (43.8)           | 1.66 | 1.42–1.93 | 1.67 <sup>a</sup> | 1.43–1.95 |
| Caesarean section                            | 404 (53.9)        | 2,576 (40.2)           | 1.74 | 1.49–2.03 | 1.75 <sup>a</sup> | 1.50–2.04 |
| Preeclampsia                                 | 13 (1.7)          | 64 (1.0)               | 1.75 | 0.96–3.19 | 1.78 <sup>b</sup> | 0.95–3.33 |
| Preterm delivery                             | 8 (1.1)           | 81 (1.3)               | 0.84 | 0.41–1.75 |                   |           |
| Placental abruption                          | 0                 | 7 (0.1)                | NE   |           |                   |           |
| Other obstetric trauma                       | 7 (0.9)           | 146 (2.3)              | 0.40 | 0.19–0.87 |                   |           |
| Maternal distress during labour and delivery | 0                 | 3 (0.05)               | NE   |           |                   |           |
| Twin pregnancy                               | 4 (0.5)           | 14 (0.2)               | 2.45 | 0.80–7.46 |                   |           |

Values are presented as number (%).

AS, ankylosing spondylitis; HIRA, Health Insurance Review and Assessment Service; OR, odds ratio; CI, confidence interval; NE, not estimated.

<sup>a</sup>Adjusted for presence of hypertension and diabetes mellitus.

<sup>b</sup>Adjusted for presence of hypertension. OR of maternal complications compared between two groups using a generalized linear model with binomial distribution.
