# Supplementary material for: Pregnancy outcomes in Korean women with ankylosing spondylitis
Source: PubMed Central journal article supplement — Korean J Intern Med. 2019 Sep 26;36(3):721–30. doi: 10.3904/kjim.2019.144 (PMC8137399; doi:10.3904/kjim.2019.144), 2019-09-26
Supplement: kjim-2019-144-suppl5.pdf [file kjim-2019-144-suppl5.pdf]

**Supplementary Table 5. Maternal and foetal outcomes in first delivery of women with AS and controls: hospital-based cohort (primipara)**

| Outcome                            | With AS (n = 21) | Without AS (n = 108) | p value <sup>a</sup> |
|------------------------------------|------------------|----------------------|----------------------|
| Caesarean section                  | 9 (42.9)         | 22 (20.4)            | 0.047                |
| Elective                           | 6 (28.6)         | 16 (14.8)            | 0.061                |
| Emergency                          | 3 (14.3)         | 6 (5.6)              | 0.061                |
| CS among trial of labor            | 1/13 (7.7)       | 4/90 (4.4)           | 0.498                |
| Preeclampsia                       | 0                | 4 (3.7)              | > 0.999 <sup>b</sup> |
| Preterm delivery                   | 3 (14.3)         | 6 (5.6)              | 0.163                |
| Maternal death                     | 0                | 0                    | -                    |
| Transfusion                        | 0                | 2 (1.9)              | > 0.999 <sup>b</sup> |
| Gestation, wk                      | 38.8 ± 1.5       | 39.0 ± 1.8           | 0.730                |
| Hospital stay, day                 | 4.1 ± 2.9        | 5.1 ± 7.9            | 0.283                |
| Low birth weight                   | 5 (23.8)         | 9 (8.3)              | 0.052                |
| Small-for-gestational-age          | 3 (11.1)         | 10 (9.3)             | 0.723                |
| Neonatal weight, g <sup>c</sup>    | 2,922.8 ± 527.0  | 3,063.6 ± 507.5      | 0.213                |
| Twin pregnancy                     | 4 (19.0)         | 8 (7.4)              | 0.107                |
| <i>In vitro</i> fertilisation      | 3 (14.3)         | 11 (10.2)            | 0.700                |
| Fetal growth restriction           | 2 (9.5)          | 5 (4.6)              | 0.319                |
| Congenital malformation            | 1 (4.8)          | 1 (0.9)              | 0.300                |
| Fetal loss                         | 0                | 0                    | -                    |
| 1 min Apgar Score < 4 <sup>c</sup> | 1 (4.0)          | 2 (1.7)              | 0.446                |
| 5 min Apgar Score < 7 <sup>c</sup> | 1 (4.0)          | 4 (3.5)              | > 0.999              |
| Sex of child, female <sup>c</sup>  | 13 (52.0)        | 64 (55.2)            | 0.827                |

Values are presented as number (%) or mean ± SD.

AS, ankylosing spondylitis; CS, Caesarean section.

<sup>a</sup>p value calculated from regression models estimated using generalised estimating equations (GEEs) to account for the matched nature of the data.

<sup>b</sup>p value calculated from Fisher exact test, because of zero events in either group in which GEE models do not converge.

<sup>c</sup>Analysed by neonates and information of twins, pregnancies with AS (n = 25) and pregnancies without AS (n = 116).
