# Supplementary material for: Pregnancy outcomes in Korean women with ankylosing spondylitis
Source: PubMed Central journal article supplement — Korean J Intern Med. 2019 Sep 26;36(3):721–30. doi: 10.3904/kjim.2019.144 (PMC8137399; doi:10.3904/kjim.2019.144), 2019-09-26
Supplement: kjim-2019-144-suppl6.pdf [file kjim-2019-144-suppl6.pdf]

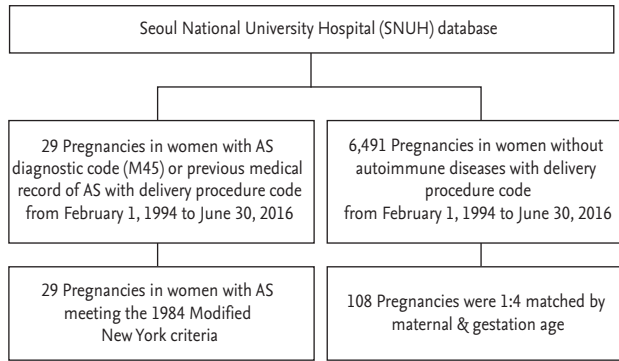

**Supplementary Figure 1.** Selection of study participants from the Seoul National University Hospital and Assessment Service database. AS, ankylosing spondylitis.
